# Supplementary material
Source: MDPI journal article supplement (https://www.mdpi.com/2306-5338/9/6/106)
Supplement: s1 [file s1]

Archive with 60 entries (54 files):
- SGD Modeling SI/
- __MACOSX/._SGD Modeling SI
- SGD Modeling SI/Literature Examples/
- __MACOSX/SGD Modeling SI/._Literature Examples
- SGD Modeling SI/.DS_Store
- __MACOSX/SGD Modeling SI/._.DS_Store
- SGD Modeling SI/Box Models/
- __MACOSX/SGD Modeling SI/._Box Models
- SGD Modeling SI/Mixing Models/
- __MACOSX/SGD Modeling SI/._Mixing Models
- SGD Modeling SI/Project Open RaDOM Visual Instructions.pdf
- __MACOSX/SGD Modeling SI/._Project Open RaDOM Visual Instructions.pdf
- SGD Modeling SI/Literature Examples/.DS_Store
- __MACOSX/SGD Modeling SI/Literature Examples/._.DS_Store
- SGD Modeling SI/Literature Examples/Box Models/
- __MACOSX/SGD Modeling SI/Literature Examples/._Box Models
- SGD Modeling SI/Literature Examples/Mixing Models/
- __MACOSX/SGD Modeling SI/Literature Examples/._Mixing Models
- SGD Modeling SI/Box Models/BoxModel_2Tracer_1Source_v2022.R
- __MACOSX/SGD Modeling SI/Box Models/._BoxModel_2Tracer_1Source_v2022.R
- SGD Modeling SI/Box Models/BoxModel_2Tracer_1Source_WithExampleData_v2022.R
- __MACOSX/SGD Modeling SI/Box Models/._BoxModel_2Tracer_1Source_WithExampleData_v2022.R
- SGD Modeling SI/Box Models/BoxModel_3Tracer_1Source_v2022.R
- __MACOSX/SGD Modeling SI/Box Models/._BoxModel_3Tracer_1Source_v2022.R
- SGD Modeling SI/Box Models/BoxModel_3Tracer_2Source_v2022.R
- __MACOSX/SGD Modeling SI/Box Models/._BoxModel_3Tracer_2Source_v2022.R
- SGD Modeling SI/Mixing Models/.Rhistory
- __MACOSX/SGD Modeling SI/Mixing Models/._.Rhistory
- SGD Modeling SI/Mixing Models/MixModel_4Tracer_3Source_v2022.R
- __MACOSX/SGD Modeling SI/Mixing Models/._MixModel_4Tracer_3Source_v2022.R
- SGD Modeling SI/Mixing Models/MixModel_3Tracer_2Source_v2022.R
- __MACOSX/SGD Modeling SI/Mixing Models/._MixModel_3Tracer_2Source_v2022.R
- SGD Modeling SI/Mixing Models/MixModel_2Tracer_3Source_v2022.R
- __MACOSX/SGD Modeling SI/Mixing Models/._MixModel_2Tracer_3Source_v2022.R
- SGD Modeling SI/Mixing Models/MixModel_2Tracer_2Source_v2022.R
- __MACOSX/SGD Modeling SI/Mixing Models/._MixModel_2Tracer_2Source_v2022.R
- SGD Modeling SI/Mixing Models/MixModel_3Tracer_3Source_v2022.R
- __MACOSX/SGD Modeling SI/Mixing Models/._MixModel_3Tracer_3Source_v2022.R
- SGD Modeling SI/Literature Examples/Box Models/Hwang2005a.R
- __MACOSX/SGD Modeling SI/Literature Examples/Box Models/._Hwang2005a.R
- SGD Modeling SI/Literature Examples/Box Models/Garcia-Solsona2010.R
- __MACOSX/SGD Modeling SI/Literature Examples/Box Models/._Garcia-Solsona2010.R
- SGD Modeling SI/Literature Examples/Box Models/.DS_Store
- __MACOSX/SGD Modeling SI/Literature Examples/Box Models/._.DS_Store
- SGD Modeling SI/Literature Examples/Box Models/Hwang2005b.R
- __MACOSX/SGD Modeling SI/Literature Examples/Box Models/._Hwang2005b.R
- SGD Modeling SI/Literature Examples/Box Models/Luo2014.R
- __MACOSX/SGD Modeling SI/Literature Examples/Box Models/._Luo2014.R
- SGD Modeling SI/Literature Examples/Box Models/Shellenbarger2006.R
- __MACOSX/SGD Modeling SI/Literature Examples/Box Models/._Shellenbarger2006.R
- SGD Modeling SI/Literature Examples/Mixing Models/.Rhistory
- __MACOSX/SGD Modeling SI/Literature Examples/Mixing Models/._.Rhistory
- SGD Modeling SI/Literature Examples/Mixing Models/.DS_Store
- __MACOSX/SGD Modeling SI/Literature Examples/Mixing Models/._.DS_Store
- SGD Modeling SI/Literature Examples/Mixing Models/Su2014.R
- __MACOSX/SGD Modeling SI/Literature Examples/Mixing Models/._Su2014.R
- SGD Modeling SI/Literature Examples/Mixing Models/Moore2003.R
- __MACOSX/SGD Modeling SI/Literature Examples/Mixing Models/._Moore2003.R
- SGD Modeling SI/Literature Examples/Mixing Models/.Rapp.history
- __MACOSX/SGD Modeling SI/Literature Examples/Mixing Models/._.Rapp.history
