# Supplementary material
Source: MDPI journal article supplement (https://www.mdpi.com/2306-5338/9/6/106)
Supplement: s1 [file s1 › SGD Modeling SI/Project Open RaDOM Visual Instructions.pdf]

# Project Open RaDOM

## Visual Instructions

The easiest way to run the models if you have never used R before is to use workspace I created in RStudio Online.

1. Go to the [Project RaDOM workspace](#). You will be asked to create an account. The free version is sufficient for these models.
2. This creates a temporary copy of the original workspace, that you can edit and modify without changing the original workspace. So, don't worry about messing the original documents up. You can't from this workspace. You will be prompted at the top so save a copy of this workspace. You may want to do that if you plan to use these models more than once.

3. Look at the bottom right of your workspace. You will see a folders area:

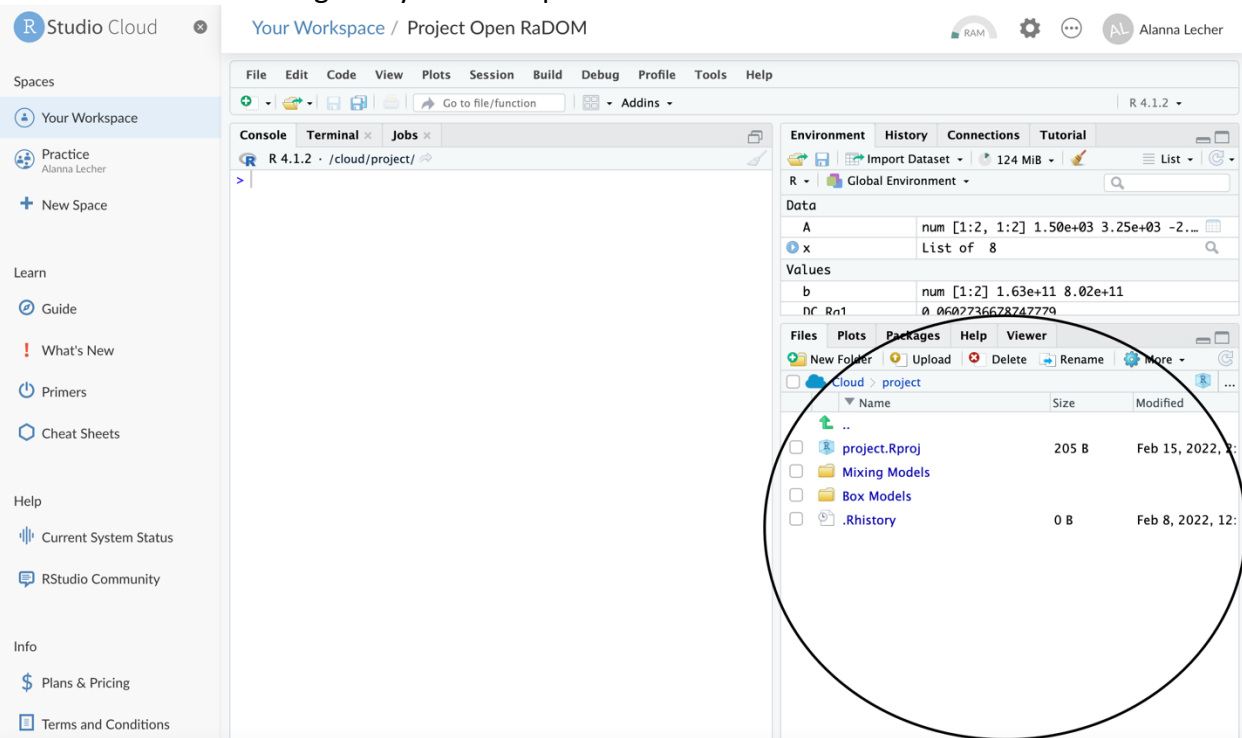

This is where all of the scripts are housed that are available in Project RaDOM. Scripts are packets of code. In this tutorial you will run the 2 tracer, 1 source box model script with example data. Double click on the box model folder to open it. It will contain the box model scripts listed on the Project Open RaDOM website.

4. Find the script named "BoxModel\_2Tracer\_1Source\_WithExampleData.R" and click on it. This will open up the script in a new window in the upper left. Below it is the console, where the results will be output.

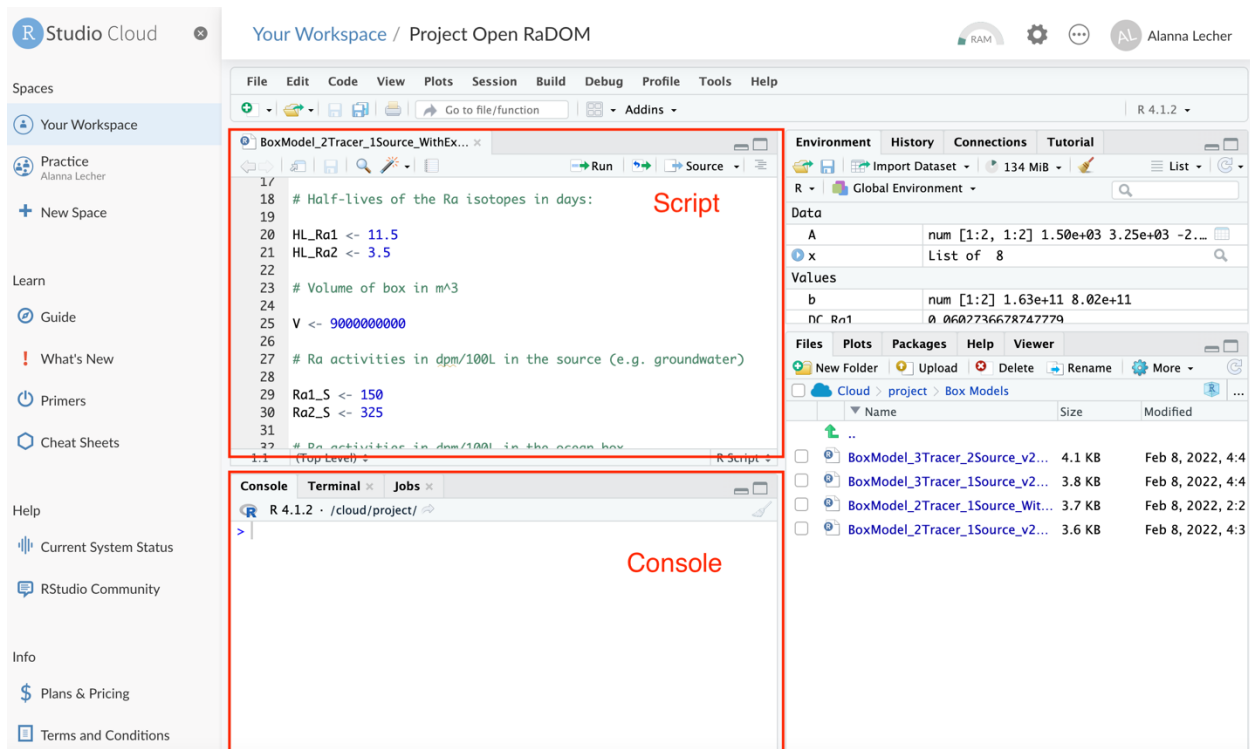

5. The first thing you need to do is install the nnls package. You only need to do this once. It will then work with every other script you use in this workspace. In the console type as “install.packages(“nnls”)” as shown below then hit enter.

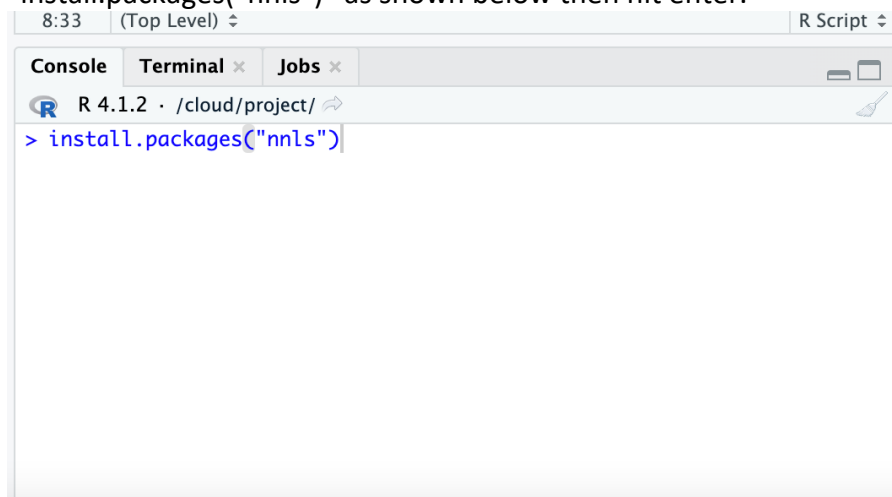

A bunch of text will load in the console indicating the package is being installed.

6. Look at the script. Every line that begins with a # is a note explaining what that code does or a instructions on how to use it. Look through the top part of the script. You will see instructions on what to edit to adapt the model to your data. Examples of these input areas is highlighted below. This model is preloaded with data to test it, but other scripts in Project Open RaDOM do not have data.

The screenshot displays the RStudio interface with the following components:

- Script Editor:** Contains an R script with comments and variable assignments. Red boxes highlight the values 11.5, 3.5, 9000000000, 150, and 325.
- Environment Pane:** Shows the current environment with variables A, x, b, and nC\_Ra1.
- Console:** Shows the R prompt and the command `install.packages("nnls")`.

**R Script Content:**

```

16 # Input the values of the variables to the right of the arrows below:
17
18 # Half-lives of the Ra isotopes in days:
19
20 HL_Ra1 <- 11.5
21 HL_Ra2 <- 3.5
22
23 # Volume of box in m^3
24
25 V <- 9000000000
26
27 # Ra activities in dpm/100L in the source (e.g. groundwater)
28
29 Ra1_S <- 150
30 Ra2_S <- 325

```

**Environment Pane Data:**

| Variable | Value              |
|----------|--------------------|
| A        | num [1:2, 1:2] 1.. |
| x        | List of 8          |
| b        | num [1:2] 1.63e+1  |
| nC_Ra1   | 0.060273667874777  |

**Console Output:**

```

R 4.1.2 · /cloud/project/
> install.packages("nnls")

```

There is a note in the script telling you where to stop editing. Editing below this note may prevent the model from functioning correctly. If you wish to add more sources or unknown terms you can edit below that line, but to run the model as is only edit where instructed.

7. To run the model with the example data click “Source” above the script. “Source” will run the entire script “Run” will only run one line of code.



The screenshot displays the RStudio interface with the following components:

- Source Editor:** Contains an R script for `BoxModel_2Tracer_1Source_WithExampleData.R`. The script defines Ra activities for source, ocean box, and offshore regions, and then runs a model function.
- Environment:** Shows the current environment with variables `A` (a numeric vector) and `x` (a list).
- Files:** Lists project files including `BoxModel_3Tracer_2Source_v2...`, `BoxModel_3Tracer_1Source_v2...`, `BoxModel_2Tracer_1Source_Wit...`, and `BoxModel_2Tracer_1Source_v2...`.
- Console:** Shows the output of the model run, which includes the SGD flux, residence time, and residual sum of squares. The output is highlighted with a red box.

```
# Ra activities in dpm/100L in the source (e.g. groundwater)
Ra1_S <- 150
Ra2_S <- 325

# Ra activities in dpm/100L in the ocean box
Ra1_B <- 30
Ra2_B <- 45

# Ra offshore activities in dpm/100L
Ra1_0 <- 5
Ra2_0 <- 3

# Run the model
model <- runBoxModel(Ra1_S, Ra2_S, Ra1_B, Ra2_B, Ra1_0, Ra2_0)

# Print results
print(paste("SGD flux in m^3/day = ", SGD_flux))
print(paste("residence time in days = ", residence_time))
print(paste("residual sum of squares = ", RSS))
```

Console Output:

```
[1] "SGD flux in m^3/day = 598822804.210455"
[1] "residence time in days = 3.30389601389787"
[1] "residual sum of squares = 0"
```

9. Adapt the input values to your data and run the model!
